# Supplementary material for: Perioperative Platelet Count Ratio Predicts Long-Term Survival after Left Pancreatectomy and Splenectomy for Pancreatic Adenocarcinoma
Source: MDPI journal article supplement (doi:10.3390/jcm13041050), 2024-02-12
Supplement: s1 [file s1]

**Supplementary Figure S1:** The optimal cutpoint for perioperative platelet ratio in predicting overall survival was determined using the maximally selected rank statistic.

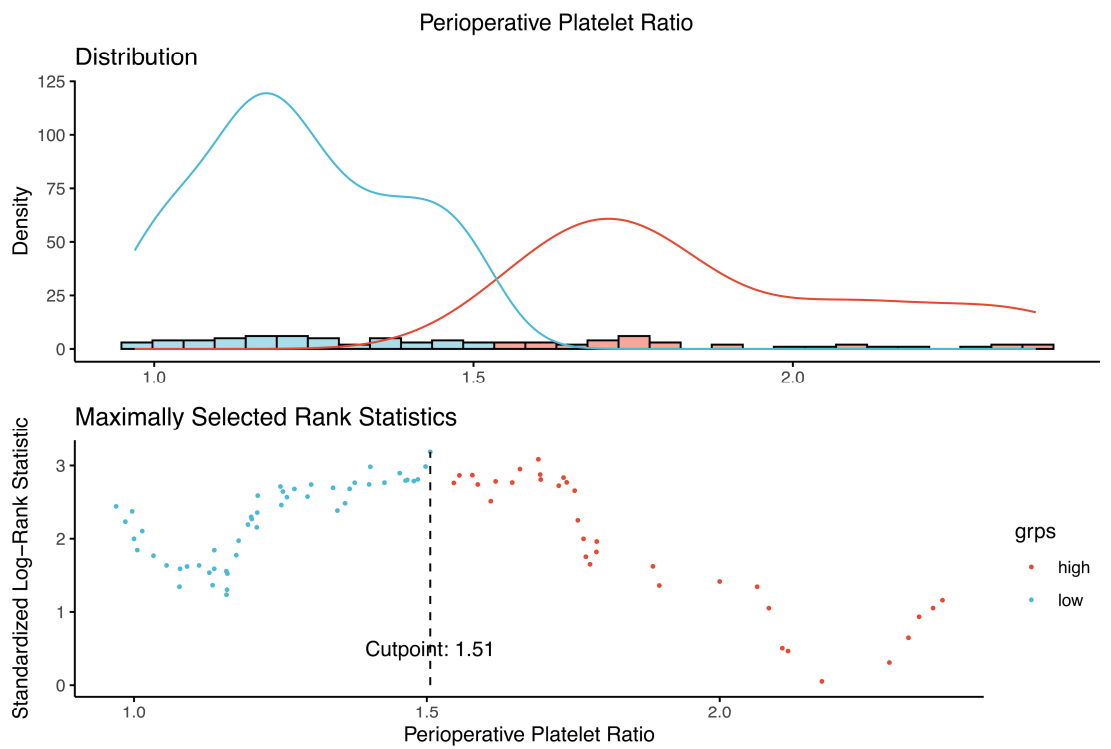

**Supplementary Table S1.** Rate of missing data among the variables collected.

|                                                                                                                                                                                                                                                                                      | Left Pancreatectomy and<br>Splenectomy (n=106) | Pancreaticoduodenectomy<br>(n=245) |
|--------------------------------------------------------------------------------------------------------------------------------------------------------------------------------------------------------------------------------------------------------------------------------------|------------------------------------------------|------------------------------------|
| Sex                                                                                                                                                                                                                                                                                  | 1 (0.9%)                                       | 0 (0.0%)                           |
| Age                                                                                                                                                                                                                                                                                  | 0 (0.0%)                                       | 0 (0.0%)                           |
| BMI                                                                                                                                                                                                                                                                                  | 6 (5.7%)                                       | 18 (7.3%)                          |
| Smoking                                                                                                                                                                                                                                                                              | 5 (4.7%)                                       | 0 (0.0%)                           |
| Hypertension                                                                                                                                                                                                                                                                         | 0 (0.0%)                                       | 0 (0.0%)                           |
| Ischemic heart disease                                                                                                                                                                                                                                                               | 0 (0.0%)                                       | 0 (0.0%)                           |
| Congestive heart failure                                                                                                                                                                                                                                                             | 0 (0.0%)                                       | 0 (0.0%)                           |
| Diabetes                                                                                                                                                                                                                                                                             | 0 (0.0%)                                       | 0 (0.0%)                           |
| COPD                                                                                                                                                                                                                                                                                 | 0 (0.0%)                                       | 0 (0.0%)                           |
| Asthma                                                                                                                                                                                                                                                                               | 0 (0.0%)                                       | 0 (0.0%)                           |
| Chronic renal failure                                                                                                                                                                                                                                                                | 0 (0.0%)                                       | 0 (0.0%)                           |
| Neoadjuvant therapy                                                                                                                                                                                                                                                                  | 0 (0.0%)                                       | 0 (0.0%)                           |
| Preoperative CA 19-9                                                                                                                                                                                                                                                                 | 21 (20%)                                       | 67 (27%)                           |
| Preoperative CEA                                                                                                                                                                                                                                                                     | 20 (19%)                                       | 60 (24%)                           |
| Preoperative albumin                                                                                                                                                                                                                                                                 | 5 (4.7%)                                       | 17 (6.9%)                          |
| Preoperative bilirubin                                                                                                                                                                                                                                                               | 10 (9.4%)                                      | 0 (0.0%)                           |
| Preoperative CRP                                                                                                                                                                                                                                                                     | 28 (26%)                                       | 55 (22%)                           |
| Preoperative WBC count                                                                                                                                                                                                                                                               | 0 (0.0%)                                       | 23 (9.4%)                          |
| Preoperative neutrophil count                                                                                                                                                                                                                                                        | 10 (9.4%)                                      | 20 (8.2%)                          |
| Preoperative lymphocyte count                                                                                                                                                                                                                                                        | 10 (9.4%)                                      | 20 (8.2%)                          |
| Preoperative platelet count                                                                                                                                                                                                                                                          | 0 (0.0%)                                       | 0 (0.0%)                           |
| Preoperative Hb                                                                                                                                                                                                                                                                      | 0 (0.0%)                                       | 0 (0.0%)                           |
| Preoperative PLR                                                                                                                                                                                                                                                                     | 10 (9.4%)                                      | 20 (8.2%)                          |
| Preoperative NLR                                                                                                                                                                                                                                                                     | 10 (9.4%)                                      | 20 (8.2%)                          |
| Preoperative HALP score                                                                                                                                                                                                                                                              | 14 (13%)                                       | 22 (8.97%)                         |
| Laparoscopic vs. open                                                                                                                                                                                                                                                                | 0 (0.0%)                                       | 0 (0.0%)                           |
| Operative time                                                                                                                                                                                                                                                                       | 12 (11%)                                       | 59 (24%)                           |
| Major complications (CD $\geq$ 3)                                                                                                                                                                                                                                                    | 0 (0.0%)                                       | 0 (0.0%)                           |
| Reoperation                                                                                                                                                                                                                                                                          | 3 (2.8%)                                       | 0 (0.0%)                           |
| Length of stay                                                                                                                                                                                                                                                                       | 2 (1.9%)                                       | 2 (0.8%)                           |
| Readmission                                                                                                                                                                                                                                                                          | 0 (0.0%)                                       | 0 (0.0%)                           |
| Postoperative CRP                                                                                                                                                                                                                                                                    | 22 (21%)                                       | 43 (18%)                           |
| Postoperative lymphocyte count                                                                                                                                                                                                                                                       | 0 (0.0%)                                       | 5 (2.0%)                           |
| Postoperative platelet count                                                                                                                                                                                                                                                         | 0 (0.0%)                                       | 0 (0.0%)                           |
| PPR                                                                                                                                                                                                                                                                                  | 0 (0.0%)                                       | 0 (0.0%)                           |
| Adjuvant therapy                                                                                                                                                                                                                                                                     | 3 (2.8%)                                       | 0 (0.0%)                           |
| Tumor size                                                                                                                                                                                                                                                                           | 14 (13%)                                       | 21 (8.6%)                          |
| Margins (R0 vs. R1)                                                                                                                                                                                                                                                                  | 14 (13%)                                       | 8 (3.3%)                           |
| No. of sampled lymph nodes                                                                                                                                                                                                                                                           | 15 (14%)                                       | 5 (2.0%)                           |
| Lymph node involvement                                                                                                                                                                                                                                                               | 15 (14%)                                       | 5 (2.0%)                           |
| No. of positive lymph nodes                                                                                                                                                                                                                                                          | 15 (14%)                                       | 5 (2.0%)                           |
| Lymphovascular invasion                                                                                                                                                                                                                                                              | 19 (18%)                                       | 18 (7.3%)                          |
| Perineural invasion                                                                                                                                                                                                                                                                  | 0 (0.0%)                                       | 19 (7.8%)                          |
| Abbreviations: BMI, body mass index; COPD, chronic obstructive pulmonary disease; WBC, white blood cell; PLR, platelet to lymphocyte ratio; NLR, neutrophil to lymphocyte ratio; HALP, hemoglobin albumin lymphocyte platelet; PPR, perioperative platelet ratio; CD, Clavien-Dindo. |                                                |                                    |
